# Supplementary material for: Ultrasound Measurement of Tumor-Free Distance from the Serosal Surface as the Alternative to Measuring the Depth of Myometrial Invasion in Predicting Lymph Node Metastases in Endometrial Cancer
Source: Preprints.org preprint supplement (doi:10.20944/preprints202107.0676.v1), 2021-07-30
Supplement: Supplementary file 1 [file supplementary]

Figures S3-S4

Regarding uMI (less or equal- or over 1/2 or 50%) differences between survival curves are not statistically significant (Log-rank test, p=0.5949) (Figure S3a). Differences between survival curves according to uTFD (<5.2 mm, >= 5.2 mm) are not statistically significant (log-rank test, p=0.9225) (Figure S3b). Differences between recurrence-free survival curves regarding uMI were not statistically significant (log-rank test, p=0.7606) (Figure S4a). Differences between reference-free survival curves regarding uTFD were not statistically significant (log-rank test, p=0.8563) (Figure S4b).

|  |  |
| --- | --- |
| (**a**) | (**b**) |

**Figure S3.** Overall survival of patients according to uMI (**a**) and uTFD (**b**).

|  |  |
| --- | --- |
| (**a**) | (**b**) |

**Figure S4.** Recurrence-free survival of patients according to uMI (**a**) and uTFD (**b**).
