# Supplementary material for: Ultrasound Measurement of Tumor-Free Distance from the Serosal Surface as the Alternative to Measuring the Depth of Myometrial Invasion in Predicting Lymph Node Metastases in Endometrial Cancer
Source: Preprints.org preprint supplement (doi:10.20944/preprints202107.0676.v1), 2021-07-30
Supplement: Supplementary file 2 [file Diagnostics_Figure S2.docx]

**Figure S2.** Compatibility between uTFD and pTFD (Pearson correlation coefficient = 0.6835, p<0.001)
