# Supplementary material for: Ultrasound Measurement of Tumor-Free Distance from the Serosal Surface as the Alternative to Measuring the Depth of Myometrial Invasion in Predicting Lymph Node Metastases in Endometrial Cancer
Source: Preprints.org preprint supplement (doi:10.20944/preprints202107.0676.v1), 2021-07-30
Supplement: Supplementary file 3 [file Diagnostics_Figure S5.docx]

|  |  |
| --- | --- |
| (**a**) | (**b**) |

**Figure S5.** The Kaplan-Meier curves of **(a)** overall survival and **(b)** recurrence-free survival of the study group according to lymph nodes status.
