# Supplementary material for: Ultrasound Measurement of Tumor-Free Distance from the Serosal Surface as the Alternative to Measuring the Depth of Myometrial Invasion in Predicting Lymph Node Metastases in Endometrial Cancer
Source: Preprints.org preprint supplement (doi:10.20944/preprints202107.0676.v1), 2021-07-30
Supplement: Supplementary file 5 [file Diagnostics_Table S1.docx]

**Table S1.** Multivariate analysis of the value of predictive factors for lymph node metastasis only for patients with ESGO&ESTRO&ESP Guidelines 2021>Low (n=64 patients)*

| Variable | | OR (95%CI) | p value | Significance (α=0.05) | ACC | Specificity | Sensitivity | NPV | PPV |
| --- | --- | --- | --- | --- | --- | --- | --- | --- | --- |
| Ultrasound  parameter | (u)MI (≥ 50%) | 0.534 (0.148 – 1.924) | 0.337 | No | 64.06% | 65.91% | 60% | 78.38% | 44.44% |
| (u)TFD | 0.943 (0.809 –1.100) | 0.456 | No |

*There was no patients having metastases to the lymph nodes in the low-risk group.
