# Supplementary material for: Ultrasound Measurement of Tumor-Free Distance from the Serosal Surface as the Alternative to Measuring the Depth of Myometrial Invasion in Predicting Lymph Node Metastases in Endometrial Cancer
Source: Preprints.org preprint supplement (doi:10.20944/preprints202107.0676.v1), 2021-07-30
Supplement: Supplementary file 6 [file Diagnostics_Table S2.docx]

**Table S2.** Relationship between ultrasound and histopathological measurement of the degree of endometrial cancer (MI) infiltration

|  | pMI | |  |
| --- | --- | --- | --- |
| uMI | pMI < 50% | pMI ≥ 50% | Total |
| uMI < 50% | 60 | 16 | 76 |
| uMI ≥ 50% | 11 | 29 | 40 |
| Total | 71 | 45 | 116 |

Legend: uMI - ultrasound measured the depth of invasion of the uterine muscle; pMI - pathomorphologically measured the depth of invasion of the uterine muscle (Chi-square test, p < 0.00001).
