# Supplementary material for: Ultrasound Measurement of Tumor-Free Distance from the Serosal Surface as the Alternative to Measuring the Depth of Myometrial Invasion in Predicting Lymph Node Metastases in Endometrial Cancer
Source: Preprints.org preprint supplement (doi:10.20944/preprints202107.0676.v1), 2021-07-30
Supplement: Supplementary file 7 [file Diagnostics_Table S3.docx]

**Table S3.** Kruskal-Wallis test for uTFD grouped by risk level (ESGO 2012)

|  | | *Low R: 70*.*953* | | --- | | | *Intermediate R: 48.328* | | --- | | | *High R: 45.433* | | --- | |
| --- | --- | --- | --- | --- | --- | --- |
| | *Low* | | --- | |  | 0.007310 | 0.002424 |
| | *Intermediate* | | --- | | 0.007310 |  | 1.000000 |
| | *High* | | --- | | 0.002424 | 1.000000 |  |

Legend: R – Average ranks for groups
